# Supplementary material
Source: MDPI journal article supplement (https://www.mdpi.com/2571-8797/4/1/5)
Supplement: s1 [file s1]

**Supplementary Table S1**

| Parameter      | Value                                                                                |
|----------------|--------------------------------------------------------------------------------------|
| Acidity        | $\leq 30$ %                                                                          |
| Peroxide index | $\leq 20$ mEq O <sub>2</sub> kg <sup>-1</sup>                                        |
| UV absorbance  | $\leq 2.5$ (K232); $\leq 0.22$ (K268)                                                |
| Delta          | K $\leq 0.01$                                                                        |
| Waxes          | $\leq 150$ mg kg <sup>-1</sup>                                                       |
| Energy         | 3,378 kJ 100 mL <sup>-1</sup>                                                        |
| Fat            | 13 g 100 mL <sup>-1</sup> (14 % saturated; 77% monounsaturated; 9 % polyunsaturated) |
| Carbohydrates  | 0 g 100 mL <sup>-1</sup>                                                             |
| Proteins       | 0 g 100 mL <sup>-1</sup>                                                             |
| Salt           | 0 g 100 mL <sup>-1</sup>                                                             |
